# Supplementary material for: Ultrasound-assisted synthesis of BiVO4/C-dots/g-C3N4Z-scheme heterojunction photocatalysts for degradation of minocycline hydrochloride and Rhodamine B: optimization and mechanism investigation
Source: Royal Society of Chemistry journal article supplement (doi:10.1039/d0nj03375h), 2020-01-01
Supplement: d0nj03375h1.pdf [file d0nj03375h1.pdf]

## Supplementary Information

Electronic Supplementary Information (ESI) for *New Journal of Chemistry*.

**Ultrasound assisted synthesis of BiVO<sub>4</sub>/c-Dots/g-C<sub>3</sub>N<sub>4</sub> Z-scheme heterojunction photocatalyst for degradation of minocycline hydrochloride and Rhodamine B: Optimization and mechanism investigation**

*Qiang Yang<sup>1</sup>, Siqi Wei<sup>1</sup>, Limei Zhang<sup>1</sup>, and Rui Yang<sup>1,\*</sup>*

*<sup>1</sup>School of Chemistry and Chemical Engineering, Southwest University, No.2 Tiansheng Road, Chongqing 400715, People's Republic of China*

**\*Corresponding author**

Dr. Rui Yang (E-mail address: ruiyang@swu.edu.cn)

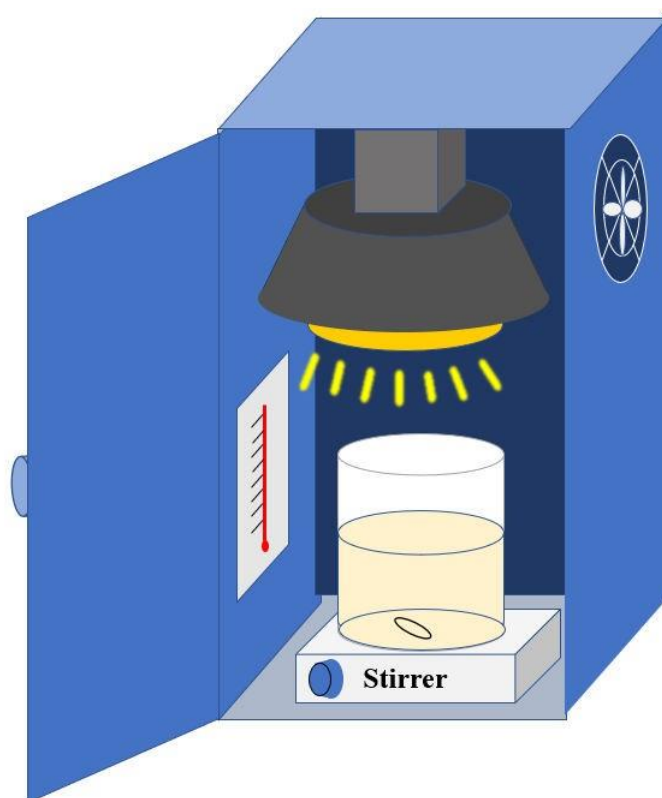

**Fig.S1** Schematic diagram of photocatalytic equipment. A 350 W LED lamp was used a light source (460 nm)

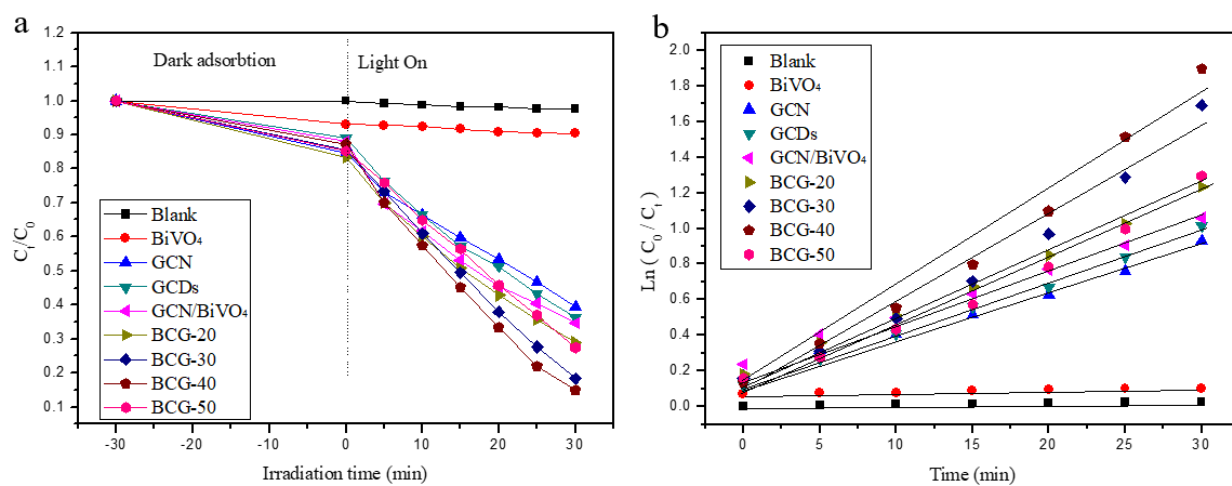

**Fig.S2** (a) The photocatalytic degradation of RhB with as-prepared photocatalyst under the light, and (b) the pseudo-first-order rate constants of RhB photodegradation over pure  $\text{BiVO}_4$ , GCN, GCDs, GCN/ $\text{BiVO}_4$ , BCG-20, BCG-30, BCG-40 and BCG-50 composite.
